# Supplementary material
Source: PubMed Central journal article supplement (PMC6794655)
Supplement: Supplemental_Material.pdf [file Supplemental_Material.pdf]

Supplemental Table 1: Nutrition content for high-fat and control diets

|                          | <b>HIGH-FAT DIET (D12492)</b> |              | <b>CONTROL DIET (D12450J)</b> |              |
|--------------------------|-------------------------------|--------------|-------------------------------|--------------|
| <b>PRODUCT</b>           | <b>gm%</b>                    | <b>kcal%</b> | <b>gm%</b>                    | <b>kcal%</b> |
| Protein                  | 26.2                          | 20           | 19.2                          | 20           |
| Carbohydrate             | 26.3                          | 20           | 67.3                          | 70           |
| Fat                      | 34.9                          | 60           | 4.3                           | 10           |
| <b>kcal/gm</b>           | 5.24                          |              | 3.85                          |              |
| <b>INGREDIENT</b>        | <b>gm</b>                     | <b>kcal</b>  | <b>gm</b>                     | <b>kcal</b>  |
| Casein                   | (30 Mesh) 200                 | 800          | (30 Mesh) 200                 | 800          |
| L-Cystine                | 3                             | 12           | 3                             | 12           |
| Corn Starch              | 0                             | 0            | 506.2                         | 2024.8       |
| Maltodextrin 10          | 125                           | 500          | 125                           | 500          |
| Sucrose                  | 68.8                          | 275.2        | 68.8                          | 275.2        |
| Cellulose, BW200         | 50                            | 0            | 50                            | 0            |
| Soybean Oil              | 25                            | 225          | 25                            | 225          |
| Lard                     | 245                           | 2205         | 20                            | 180          |
| Mineral Mix, S10026      | 10                            | 0            | 10                            | 0            |
| Di Calcium Phosphate     | 13                            | 0            | 13                            | 0            |
| Calcium Carbonate        | 5.5                           | 0            | 5.5                           | 0            |
| Potassium Citrate, 1 H2O | 16.5                          | 0            | 16.5                          | 0            |
| Vitamin Mix V10001       | 10                            | 40           | 10                            | 40           |
| Choline Bitartrate       | 2                             | 0            | 2                             | 0            |
| FD&C Blue Dye #1         | 0.05                          | 0            | 0.04                          | 0            |
| FD&C Blue Dye #5         |                               |              | 0.01                          | 0            |
| <b>Total</b>             | <b>773.85</b>                 | <b>4057</b>  | <b>1055.05</b>                | <b>4057</b>  |

Supplemental Figure 1: Experimental workflow for mouse placental explant cultures

Supplemental Figure 2: Placental cell-free DNA release in obese vs. lean dams by fetal sex and time in culture

Legend:

There is no significant difference in placental cfDNA release by fetal sex in lean and obese dams

*Lean*: Control dams; *Obese*: Maternal obesity; *M*: Male, *F*: female \*:  $p < 0.05$
